# Supplementary material
Source: bioRxiv or medRxiv preprint supplement (https://www.biorxiv.org/content/biorxiv/early/2019/12/02/862243/DC1/embed/media-1.pdf)
Supplement: Supplementary file [file media-1.pdf]

**Table S1**

| <b>samples</b>   | <b>platform</b>      | <b>library layout</b> | <b>Mean Coverage(X)</b> |
|------------------|----------------------|-----------------------|-------------------------|
| MA1_1_G31_109_r1 | Illumina GAIIx       | Paired-end            | 10.75                   |
| MA1_1_G31_109_r2 | Illumina GAIIx       | Paired-end            | 7.53                    |
| MA1_1_G31_119_r1 | Illumina GAIIx       | Paired-end            | 9.91                    |
| MA1_1_G31_119_r2 | Illumina GAIIx       | Paired-end            | 10.5                    |
| MA1_1_G31_29_r1  | Illumina GAIIx       | Paired-end            | 7.91                    |
| MA1_1_G31_29_r2  | Illumina GAIIx       | Paired-end            | 13.53                   |
| MA1_1_G31_29_r3  | Illumina GAIIx       | Paired-end            | 7.86                    |
| MA1_1_G31_39_r1  | Illumina GAIIx       | Paired-end            | 12.29                   |
| MA1_1_G31_39_r2  | Illumina GAIIx       | Paired-end            | 6.98                    |
| MA1_1_G31_49_r1  | Illumina GAIIx       | Paired-end            | 8.71                    |
| MA1_1_G31_49_r2  | Illumina GAIIx       | Paired-end            | 11.26                   |
| MA1_1_G31_59_r1  | Illumina GAIIx       | Paired-end            | 11.05                   |
| MA1_1_G31_59_r2  | Illumina GAIIx       | Paired-end            | 7.07                    |
| MA1_1_G31_79_r1  | Illumina GAIIx       | Paired-end            | 11.28                   |
| MA1_1_G31_79_r2  | Illumina GAIIx       | Paired-end            | 13.77                   |
| MA1_1_G31_89_r1  | Illumina GAIIx       | Paired-end            | 9.28                    |
| MA1_1_G31_89_r2  | Illumina GAIIx       | Paired-end            | 7.94                    |
| MA1_1_G31_99_r1  | Illumina GAIIx       | Paired-end            | 10.83                   |
| MA1_1_G31_99_r2  | Illumina GAIIx       | Paired-end            | 7.18                    |
| MA1_1_G31_99_r3  | Illumina GAIIx       | Paired-end            | 12.96                   |
| MA1_1_G32_39_r1  | Illumina GAIIx       | Paired-end            | 9.81                    |
| MA1_1_G32_39_r2  | Illumina GAIIx       | Paired-end            | 9.43                    |
| MA1_1_G32_49_r1  | Illumina GAIIx       | Paired-end            | 8.65                    |
| MA1_1_G32_49_r2  | Illumina GAIIx       | Paired-end            | 6.6                     |
| MA1_1_G3_26_r1   | Illumina GAIIx       | Paired-end            | 7.99                    |
| MA1_1_G3_87_r1   | Illumina GAIIx       | Paired-end            | 10.97                   |
| MA1_1_G3_87_r2   | Illumina GAIIx       | Paired-end            | 7.66                    |
| MA1_3_G18_12_r1  | Illumina NextSeq 500 | Single-end            | 5.86                    |
| MA1_3_G19_12_r1  | Illumina NextSeq 500 | Single-end            | 6.25                    |
| MA1_3_G20_12_r1  | Illumina NextSeq 500 | Single-end            | 6.56                    |
| MA1_3_G21_12_r1  | Illumina NextSeq 500 | Single-end            | 8.55                    |
| MA1_3_G25_12_r1  | Illumina NextSeq 500 | Single-end            | 6.46                    |
| MA1_3_G26_12_r1  | Illumina NextSeq 500 | Single-end            | 6.75                    |
| MA1_3_G28_12_r1  | Illumina NextSeq 500 | Single-end            | 8.18                    |
| MA1_3_G29_12_r1  | Illumina NextSeq 500 | Single-end            | 6.67                    |
| MA1_3_G30_12_r1  | Illumina NextSeq 500 | Single-end            | 7.2                     |
| MA3_G0           | Illumina NextSeq 500 | Single-end            | 9.44                    |
| MA3_G11_L2       | Illumina NextSeq 500 | Single-end            | 10.31                   |
| MA3_G11_L8       | Illumina NextSeq 500 | Single-end            | 23.52                   |
| MA3_G1_L2        | Illumina NextSeq 500 | Single-end            | 8.85                    |
| MA3_G1_L8        | Illumina NextSeq 500 | Single-end            | 8.47                    |
| MA3_G2_L2        | Illumina NextSeq 500 | Single-end            | 9.91                    |
| MA3_G2_L8        | Illumina NextSeq 500 | Single-end            | 9.36                    |
| MA3_G4_L2        | Illumina NextSeq 500 | Single-end            | 9.8                     |
| MA3_G4_L8        | Illumina NextSeq 500 | Single-end            | 9.38                    |
| MA3_G5_L2        | Illumina NextSeq 500 | Single-end            | 8.82                    |
| MA3_G5_L8        | Illumina NextSeq 500 | Single-end            | 8.98                    |
| MA3_G8_L2        | Illumina NextSeq 500 | Single-end            | 8.97                    |
| MA3_G8_L8        | Illumina NextSeq 500 | Single-end            | 9.43                    |

**Table S1:** WGBS information for MA pedigrees MA1\_1, MA1\_3 and MA3.
